# Supplementary material for: Hypoxia-Regulated lncRNA USP2-AS1 Drives Head and Neck Squamous Cell Carcinoma Progression
Source: MDPI journal article supplement (doi:10.3390/cells11213407), 2022-10-28
Supplement: s1 [file s1]

Table S1 Sequences of primers and shRNAs.

| Name            | Sequence (5'-3')           |
|-----------------|----------------------------|
| USP2-AS1 primer | F: GGGAGAGGCAGAGAGATCCA    |
|                 | R: CAAGGGAGCAGGACAGTGAG    |
| U1 primer       | F: CTGCGTAGTTGTGCTGATGT    |
|                 | R: GGC GGATTGGAAATGCTT     |
| GAPDH primer    | F: GTAACCCGTTGAACCCCAT     |
|                 | R: CCATCCAATCGGTAGTAGCG    |
| 18S RNA         | F: GTAACCCGTTGAACCCCAT     |
|                 | R: CCATCCAATCGGTAGTAGCG    |
| CCND1           | F: GATGCCAACCTCCTCAACGA    |
|                 | R: GGAAGCGGTCCAGGTAGTTC    |
| BCL2            | F: CTTTGAGTTCGGTGGGGTCA    |
|                 | R: GGGCCGTACAGTTCACAAA     |
| BAX             | F: CATGGGCTGGACATTGGACT    |
|                 | R: AAAGTAGGAGAGGAGGCCGT    |
| PGK1            | F: CCACTGTGGCTTCTGGCATA    |
|                 | R: ATGAGAGCTTTGGTTCCCCG    |
| DCAF13          | F: CTAGCGGACACCTCGTGGA     |
|                 | R: CCAGCGAAGCAAGGAATGGT    |
| HAS2-AS1        | F: GGAAGTCGACAGGACCTTGA    |
|                 | R: TTGTGCGACGTGATGAAAGC    |
| LUCAT1          | F: AGGATGAGACTTAGCGTGCC    |
|                 | R: CCTCGGGTTGCCTCTGTTTA    |
| E2F1            | F: GTGTAGGACGGTGAGAGCAC    |
|                 | R: ATGGGGCAGAAGAAGAGCTC    |
| E2F2            | F: TAGTAAACGGCAGCTGTGGG    |
|                 | R: GCTTGTCTCTGCTGGACCAT    |
| CDK2            | F: GACACGCTGCTGGATGTCA     |
|                 | R: CAGAAAGCTAGGCCCTGGAG    |
| LINC00703       | F: GAGGTTGAGCCCACAATCAAAC  |
|                 | R: GGGACAAGTCCATCACCATGAA  |
| PDK1            | F: TGCTGTATGGCCTGCAAGAT    |
|                 | R: ACATTCTGGCTGGTGACAGG    |
| LDHA            | F: TGTCTCTGGCAAAGTGGATACTT |
|                 | R: CTGGGTGCAGAGTCTTCAGAG   |
| H19             | F: GACTCAGGAATCGGCTCTGG    |
|                 | R: TGGCCATGAAGATGGAGTCG    |
| HIF1A-AS3       | F: GTACCTTCCGCATGCTTGGT    |

|                    |                                                                |
|--------------------|----------------------------------------------------------------|
|                    | R: ACACCCGATCTCCGTGTACTA                                       |
| HIF1A-AS1          | F: CTCCATGGTGAATCGGTCCC                                        |
|                    | R: CTGGGATCCGGGAGTCAATG                                        |
| ACTB               | F: CATGTACGTTGCTATCCAGGC                                       |
|                    | R: CTGGGATCCGGGAGTCAATG                                        |
| Sh-#1              | CCGGTTCAGCGATATGAAGTTAAATCTCGAGATTAACTT<br>CATATCGCTGAATTTTGT  |
| Sh-#2              | CCGGCTCAGCGAGATGAAGAGTTTACTCGAGTAACTCT<br>TCATCTCGCTGAGTTTTGT  |
| Sh-#3              | CCGGACAGGCTTTGGAGTCCGAGATCTCGAGATCTCGG<br>ACTCCAAAGCCTGTTTTTGT |
| ShHIF1 $\alpha$ #1 | CCGGCCGCTGGAGACACAATCATATCTCGAGATATGATT<br>GTGTCTCCAGCGGTTTTGT |
| ShHIF1 $\alpha$ #2 | CCGGCCGCTGGAGACACAATCATATCTCGAGATATGATT<br>GTGTCTCCAGCGGTTTTGT |
| shMYC              | CCGGCCCAAGGTAGTTATCCTTAAACTCGAGTTTAAGGA<br>TAACTACCTTGGGTTTTGT |
| HRE6-7             | F: AGGAGGTAGGATGTTCACTCT                                       |
|                    | R: CTGAGCGACACTGACAAACC                                        |
| HRE8-9             | F: CAGCCGGCTCTCTCCCTATAT                                       |
|                    | R: CTTCGTCAGCTGGTGCTCAC                                        |
| HRE10-11           | F: ATTAGAGCCCGGCCTCCGGC                                        |
|                    | R: TTCCAGCTGCCCCGTCGTGT                                        |
| PDK1               | F: TTAAACAGCTCACTCAAAGGC                                       |
|                    | R: CAGCCGGCGAGGTGTGGGGTG                                       |
